# Supplementary material for: Technical note: Manipulating interactions between plant stress responses and soil methane oxidation rates
Source: Copernicus journal article supplement (doi:10.5194/bg-15-4125-2018), 2018-07-06
Supplement: Supplementary file 1 [file bg-15-4125-2018-supplement.pdf]

Supplement of Biogeosciences, 15, 4125–4129, 2018  
<https://doi.org/10.5194/bg-15-4125-2018-supplement>  
© Author(s) 2018. This work is distributed under  
the Creative Commons Attribution 4.0 License.

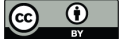

*Supplement of*

## **Technical note: Manipulating interactions between plant stress responses and soil methane oxidation rates**

**Xiaoqi Zhou et al.**

*Correspondence to:* Simeon J. Smaill ([simeon.smaill@scionresearch.com](mailto:simeon.smaill@scionresearch.com))

The copyright of individual parts of the supplement might differ from the CC BY 4.0 License.

## Supplementary information

**Table S1:** Properties of peanut biosolid material

| Property                                       | Value |
|------------------------------------------------|-------|
| pH (H <sub>2</sub> O solution; 1:2.5 dilution) | 10.1  |
| EC (md cm <sup>-1</sup> )                      | 300   |
| Ash % (moisture-free basis)                    | 6.65  |
| Carbon % (moisture-free basis)                 | 67.4  |
| Nitrogen % (moisture-free basis)               | 1.3   |

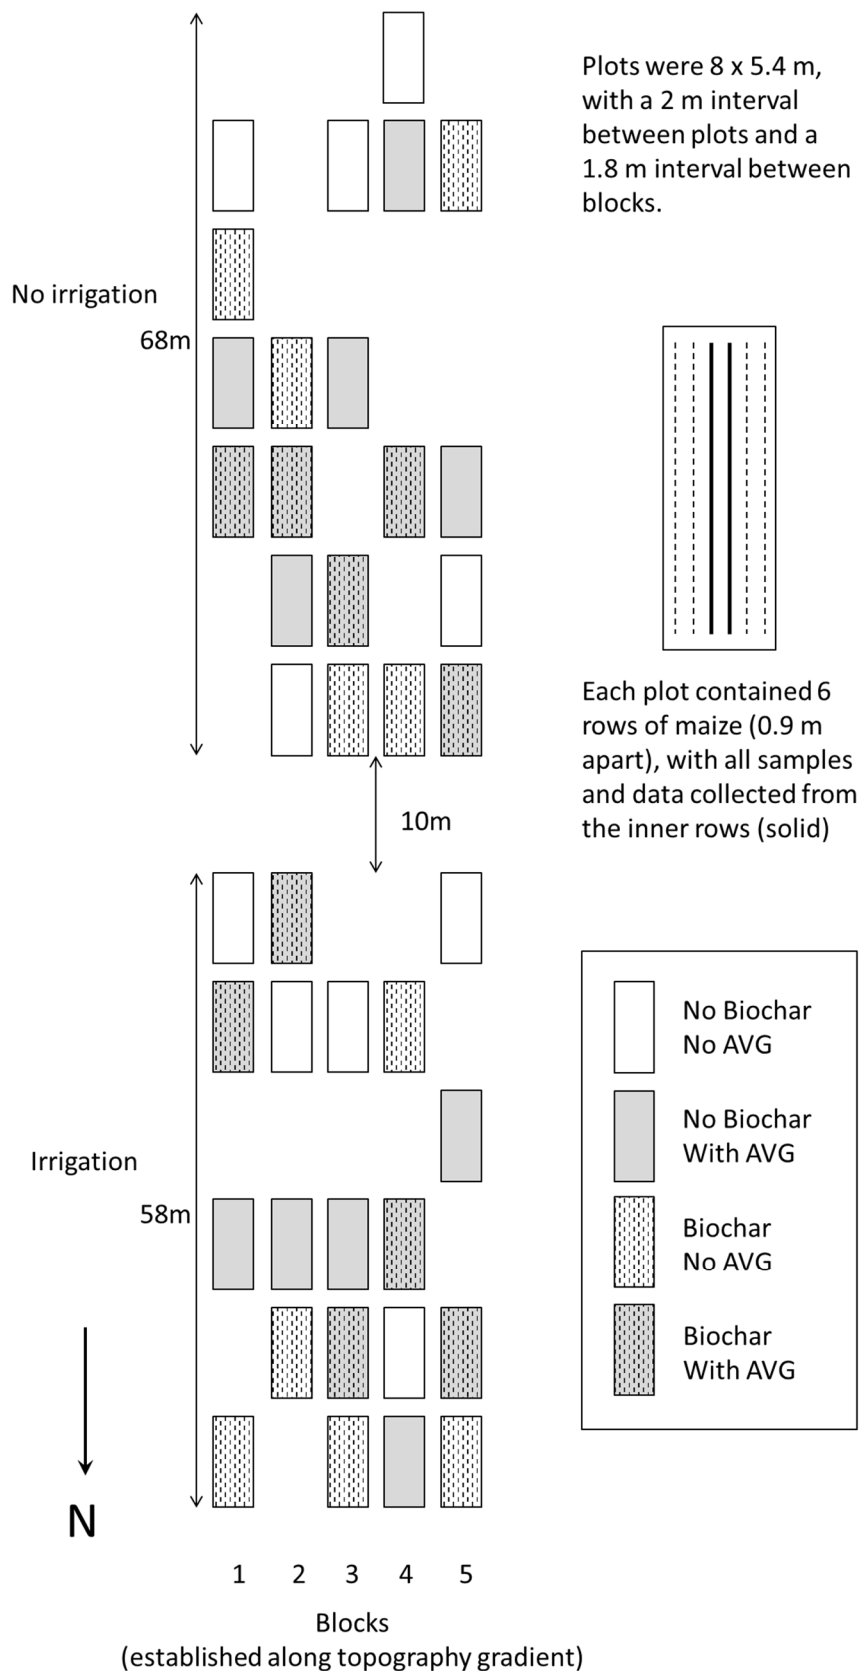

**Fig. S1.** Physical layout of the trial plots; areas not included in the trial were also planted at the same time as plot establishment using the same methodology (machine planting at 4 plants  $m^{-2}$ ).
